# Supplementary material for: Seasonal changes in diet and chemical defense in the Climbing Mantella frog (Mantella laevigata)
Source: PLoS One. 2018 Dec 26;13(12):e0207940. doi: 10.1371/journal.pone.0207940 (PMC6306172; doi:10.1371/journal.pone.0207940)
Supplement: S1 Table — The absolute and relative volume and number for each prey category for each frog is listed and summarized. (XLSX) [file pone.0207940.s002.xlsx]

## Sheet: Sheet1
Sample ID	Season	Sex	absolute no. of ants	absolute no. of mites	absolute no. of larvae	absolute no. of termites	absolute no. of other	absolute volume of ants (mm3)	absolute volume of mites (mm3)	absolute volume of larvae (mm3)	absolute volume of termites (mm3)	absolute volume of other (mm3)	% volume of ants	% volume of mites	% volume of larvae	% volume of termites	% volume of other	% number of ants	% number of mites	% number of larvae	% number of termites	% number of other
7001	dry season	Female	5	0	0	0	0	2.41902	0	0	0	0	100	0	0	0	0	100	0	0	0	0
7002	dry season	Female	18	15	0	0	0	4.40273	1.28772	0	0	0	77.3706	22.6294	0	0	0	54.5455	45.4545	0	0	0
7003	dry season	Female	52	3	0	0	1	23.2112	0.230377	0	0	0.0663156	98.7379	0.980002	0	0	0.2821	92.8571	5.35714	0	0	1.78571
7004	dry season	Female	19	0	0	0	4	7.45613	0	0	0	0.11545	98.4752	0	0	0	1.52478	82.6087	0	0	0	17.3913
7005	dry season	Female	4	0	0	18	4	2.69807	0	0	129.623	2.72972	1.99782	0	0	95.9809	2.02125	15.3846	0	0	69.2308	15.3846
7006	dry season	Female	17	0	0	0	0	4.40703	0	0	0	0	100	0	0	0	0	100	0	0	0	0
7007	dry season	Female	127	0	0	0	8	37.6615	0	0	0	1.54177	96.0672	0	0	0	3.93276	94.0741	0	0	0	5.92593
7008	dry season	Female	41	0	0	0	20	4.74332	0	0	0	3.0997	60.4782	0	0	0	39.5218	67.2131	0	0	0	32.7869
7009	dry season	Female	107	0	0	0	0	23.7177	0	0	0	0	100	0	0	0	0	100	0	0	0	0
7011	dry season	Female	36	0	0	0	4	18.0259	0	0	0	14.017	56.2555	0	0	0	43.7445	90	0	0	0	10
7012	dry season	Female	24	0	0	0	2	6.39971	0	0	0	0.395256	94.1831	0	0	0	5.81689	92.3077	0	0	0	7.69231
7500	wet season	Female	1	4	0	0	20	0.0621471	0.285259	0	0	3.13193	1.78618	8.19866	0	0	90.0152	4	16	0	0	80
7501	wet season	Female	68	6	0	0	8	3.52919	0.963585	0	0	7.05113	30.5719	8.34713	0	0	61.081	82.9268	7.31707	0	0	9.7561
7502	wet season	Female	26	6	2	2	29	11.248	0.482137	0.251141	1.9902	14.635	39.3197	1.68541	0.877918	6.95718	51.1598	40	9.23077	3.07692	3.07692	44.6154
7503	wet season	Female	18	15	0	0	54	1.48962	0.874492	0	0	8.01952	14.3458	8.42183	0	0	77.2323	20.6897	17.2414	0	0	62.069
7504	wet season	Female	11	9	66	0	11	4.25926	0.973536	1.10768	0	1.94804	51.3875	11.7456	13.364	0	23.5029	11.3402	9.27835	68.0412	0	11.3402
7505	wet season	Female	9	20	2	0	38	1.51264	5.53644	0.0906974	0	1.43758	17.6352	64.5472	1.0574	0	16.7602	13.0435	28.9855	2.89855	0	55.0725
7506	wet season	Female	75	2	2	3	17	14.6932	0.489414	1.25232	2.27507	7.12798	56.8667	1.89416	4.84682	8.80513	27.5872	75.7576	2.0202	2.0202	3.0303	17.1717
7508	wet season	Female	2	0	2	0	34	0.701589	0	0.408306	0	21.0154	3.17099	0	1.84543	0	94.9836	5.26316	0	5.26316	0	89.4737
7509	wet season	Female	3	3	1	0	31	2.11124	0.182765	0.118638	0	11.5703	15.0987	1.30705	0.848449	0	82.7458	7.89474	7.89474	2.63158	0	81.5789
